# Supplementary material
Source: publisher site journal article supplement (http://www.kjim.org/upload/media/kjim-2019-129-suppl3.pdf)
Supplement: Supplementary file 1 [file kjim-2019-129-suppl3.pdf]

**Supplementary Table 3. Systemic treatment after progression**

| Variable                         | Chemotherapy holiday (n = 9) |
|----------------------------------|------------------------------|
| Subsequent chemotherapy regimens |                              |
| Total                            | 17                           |
| 1                                | 6                            |
| 2                                | 4                            |
| ≥ 3                              | 7                            |
| Median                           | 3                            |
| No. of total cycles              | 89                           |
| Type of chemotherapy regimens    |                              |
| Capecitabine                     | 5                            |
| Gemcitabine                      |                              |
| Eribulin                         | 4                            |
| Vinorelbine                      | 1                            |
| T-DM <sub>1</sub>                | 1                            |
| Paclitaxel                       |                              |
| Docetaxel                        | 3                            |
| Nab-paclitaxel                   | 1                            |
| CMF                              | 2                            |
| Subsequent endocrine regimens    |                              |
| Total                            | 5                            |
| 1                                | 2                            |
| 2                                | 2                            |
| ≥ 3                              | 1                            |
| Type of endocrine therapy        |                              |
| Tamoxifen                        |                              |
| Letrozole                        | 2                            |
| Exemestane                       | 1                            |
| Exemestane + everolimus          | 1                            |
| Fulvestrant                      | 1                            |

T-DM<sub>1</sub>, trastuzumab emtansine; CMF, cyclophosphamide (oral) + methotrexate + 5-fluorouracil.
